# Supplementary material for: Combined assessment of low functional capacity and frailty in elective conventional cardiac surgery
Source: Research Square preprint supplement (doi:10.21203/rs.3.rs-8176099/v1), 2025-12-01
Supplement: Supplementary file 1 [file 39fd3940a08c21878d876fe9.docx]

| **Table 1.** Sample characterization and association with post-surgical complications | | | | |
| --- | --- | --- | --- | --- |
| **Variables** | **All (n=68)** | **Post-surgical complications** | | **p-value** |
| **Yes (n=22)** | **No (n=46)** |
| ***Sociodemographic***  Age  Men  Women  ***Race***  White  Black  Brown-skinned person  ***Education***  Incomplete high school  High school diploma  Bachelor's degree | 63 [52.0-68.8]  43 (53.2)  25 (36.8)  39 (57.4)  10 (14.7)  19 (27.9)  1 (1.5)  33 (48.5)  34 (50.0) | 66 [58.8-71.2]  13 (59.1)  9 (40.9)  10 (45.4)  5 (22.7)  7 (31.8)  0 (0.0)  12 (54.5)  10 (45.4) | 59.5 [48.8-66.0]  30 (65.2)  16 (34.8)  29 (63.0)  5 (10.8)  12 (26.1)  1 (2.2)  21 (45.6)  24 (52.2) | **0.004a**  0.825c  0.301c  0.652c |
| ***Clinics***  ***Comorbidities***  Hypertension  Dyslipidemia  Diabetes  Chronic kidney disease  ***Medications***  Anti-hypertensive  Diuretic  Statin  Oral anticoagulant  Oral hypoglycemic  ***Diagnosis***  CAD  VHD  HF  CHD  LVEF (%) | 51 (75.0)  43 (63.2)  19 (27.9)  1 (1.5)  51 (75.0)  24 (35.3)  44 (64.7)  11 (16.2)  19 (27.9)  13 (19.1)  47 (69.1)  4 (5.9)  4 (5.9)  65 [60.0-68.8] | 20 (90.9)  11 (50.0)  3 (13.6)  1 (4.5)  20 (90.9)  17 (47.2)  13 (59.1)  7 (31.8)  3 (13.6)  5 (22.7)  15 (68.2)  2 (9.1)  0 (0.0)  63 [55.5-67.8] | 31 (67.4)  32 (69.6)  16 (34.8)  0 (0.0)  31 (67.4)  7 (21.9)  31 (67.4)  4 (8.7)  16 (34.8)  8 (17.4)  32 (69.6)  2 (4.3)  4 (8.7)  67 [63.2-69.8] | **0.017c**  0.195c  0.126c  0.324d  0.482d  **0.010c**  0.690c  **0.030d**  0.126c  0.439c  **<0.001a** |
| Continue | | | | |

| **Table 1.** Sample characterization and association with post-surgical complications | | | | |
| --- | --- | --- | --- | --- |
| **Variables** | **All (n=68)** | **Post-surgical complications** | | **p-value** |
| **Yes (n=22)** | **No (n=46)** |
| ***Nutritional***  BMI (kg/m2)  ***BMI classification***  Malnutrition  Eutrophic  Overweight  Obesity  ***Nutritional assessment***  *7p- SGA (point)*b  Well-nutrition  Malnutrition | 26.2 [23.8-29.1]  8 (11.8)  23 (33.8)  25 (36.8)  12 (17.6)  7 [7.0-7.0]  64 (94.1)  4 (5.9) | 25.6 [22.8-28.7]  5 (22.7)  9 (40.9)  4 (18.2)  4 (18.2)  7 [7.0-7.0]  19 (86.4)  3 (13.6) | 26.8 [24.2-29.5]  3 (6.5)  14 (30.4)  21 (45.7)  8 (17.4)  7 [7.0-7.0]  45 (97.8)  1 (2.2) | 0.171a  0.076c  0.153a  0.096d |
| ***Muscle strength***  HGS (kg/f)  Reduced n, (%) | 32.8±9.5  5 (7.4) | 30.7±9.3  2 (9.1) | 33.4±9.5  3 (6.5) | 0.273b  0.656d |
| ***Surgical***  *EuroSCORE II*  ***Surgical approach*** n, (%)  CABG  SMVR  SAVR  Combined (CABG + VR)  Others  CPB time (minutes)  Aortic clamping time (minutes)  MV time (days)  ICU time (days)  Length of stay (days) | - 1. [0.7-1.9]   11 (16.2)  27 (39.7)  22 (32.4)  3 (4.4)  5 (7.4)  110.5 [99.5-130.0]  82.5 [73.0-98.2]  1 [1.0-1.0]  4 [3.0-5.0]  6 [5.0-8.0] | 1.4 [0.9-2.4]  3 (27.7)  9 (33.3)  7 (31.8)  2 (66.7)  4 (80.0)  120 [107.5-172.5]  89 [78.5-124.5]  1 [1.0-1.0]  5 [3.8-7.2]  8.5 [7.0-11.8] | 0.9 [0.6-1.6]  8 (72.7)  18 (66.7)  15 (68.2)  1 (33.3)  1 (20.0)  110 [93.8-123.5]  78 [63.2-88.8]  1 [1.0-1.0]  3 [3.0-4.0]  5 [4.0-6.0] | **0.015a**  0.716c  **0.048a**  **0.002a**  0.056a  **<0.001a**  **<0.001a** |
| ***Laboratory parameters***  Red blood cell (m/µL)  Hemoglobin (g/dL)  Hematocrit (%) | 4.6±0.6  13.6 [12.6-15.0]  40.2 [36.4-44.8] | 4.7±0.8  13.9 [12.0-15.2]  41.1 [35.9-45.2] | 4.5±0.6  13.6 [12.7-14.9]  39.6 [36.6-44.5] | 0.359b  0.808a  0.670a |
| Continue | | | | |

| **Table 1.** Sample characterization and association with post-surgical complications | | | | |
| --- | --- | --- | --- | --- |
| **Variables** | **All (n=68)** | **Post-surgical complications** | | **p-value** |
| **Yes (n=22)** | **No (n=46)** |
| ***Laboratory parameters***  Platelets (µL)  Leukocytes (µL)  Urea (mg/dL)  Creatinine (mg/dL)  Sodium (mmol/L)  Potassium (mmol/L) | 196526±52155  7655 [6500-11860]  37.2±12.3  1.0±0.3  140 [138-141]  4.3±0.5 | 181400±45862  6995 [4930-8238]  44.9±13.4  1.1±0.3  140 [138-142]  4.4±0.6 | 203761±53881  8725 [6605-13352]  33.4±10.0  1.0±0.2  140 [138-140]  4.2±0.5 | 0.098b  **0.007a**  **<0.001b**  0.061b  0.422a  0.208b |
| aMann-Whitney test for variables with non-normal distribution, bStudent's t-test for variables with normal distribution, or cPearson's chi-square test and dFisher's exact test; p<0.05 was considered statistically significant. CAD: coronary artery disease; VHD: valvular heart disease; HF: heart failure; CHD: congenital heart disease; LVEF: left ventricular ejection fraction; BMI: body mass index; 7p-SGA: 7-point subjective global assessment; HGS: handgrip strength; EuroSCORE II: European System for Cardiac Operative Risk Evaluation II; CABG: coronary artery bypass graft surgery; SMVR: surgical mitral valve replacement; SAVR: surgical aortic valve replacement; VR: valve replacement; CPB: cardiopulmonary bypass; MV: mechanical ventilation; ICU: intensive care unit. Post-surgical complications were considered: infectious (pneumonia and surgical site infection), renal (acute renal failure), neurological (hypoactive delirium), and cardiovascular (atrial fibrillation, low output syndrome, shock, type 2 acute myocardial infarction). | | | | |
