# Supplementary material for: Combined assessment of low functional capacity and frailty in elective conventional cardiac surgery
Source: Research Square preprint supplement (doi:10.21203/rs.3.rs-8176099/v1), 2025-12-01
Supplement: Supplementary file 2 [file 3ac9313e5ef3ed8e6591aa22.docx]

| **Table 3**. Association of functional capacity, frailty, and low functional capacity and frailty with post-surgical complications in elective conventional cardiac surgery | | | | |
| --- | --- | --- | --- | --- |
| **Variables** | **All (n=68)** | **Post-surgical complications** | | **p-value** |
| **Yes (n=22)** | **No (n=46)** |
| ***Functional capacity***  *SPPB* (point)  ***SPPB classification***  Incapacity  Low capacity  Moderate capacity  Good capacity | 9 [7.0-10.0]  0 (0)  14 (20.6)  31 (45.6)  23 (33.8) | 7.5 [5.0-9.3]  0 (0.0)  8 (57.1)  9 (29.0)  5 (21.7) | 9 [7.0-10.0]  0 (0.0)  6 (42.9)  22 (70.9)  18 (78.2) | **0.048a**  0.072b |
| ***Frailty***  *CFS* (point)  ***CFS classification***  Not frail  Pre-frail  Frail | 2 [1.0-3.0]  55 (80.9)  9 (13.2)  4 (5.6) | 3 [1.0-4.0]  14 (25.4)  4 (44.4)  4 (100.0) | 2 [1.0-3.0]  41 (74.5)  5 (55.6)  0 (0.0) | 0.101a  **0.006b** |
| **Low functional capacity and frailty** | 12 (17.6) | 8 (66.7) | 4 (33.3) | **0.014b** |
| **Score SPPB - CFS** | 7 [4.0-8.8] | 5.5 [1.0-7.2] | 7 [5.0-9.0] | **0.048a** |
| aMann-Whitney test for continuous variables, and bPearson's chi-square test for categorical variables; p<0.05 was considered statistically significant. SPPB: short physical performance battery; CFS: clinical frailty scale. Post-surgical complications were considered: infectious (pneumonia and surgical site infection), renal (acute renal failure), neurological (hypoactive delirium), and cardiovascular (atrial fibrillation, low output syndrome, shock, type 2 acute myocardial infarction). | | | | |
