# Supplementary material for: Combined assessment of low functional capacity and frailty in elective conventional cardiac surgery
Source: Research Square preprint supplement (doi:10.21203/rs.3.rs-8176099/v1), 2025-12-01
Supplement: Supplementary file 3 [file 3bdf00941ab41ba746087845.docx]

| **Table 4.** Multiple logistic regression model between post-surgical complications and low functional capacity and frailty | | | |
| --- | --- | --- | --- |
|  | **Post-surgical complications** | | |
|  | **OR** | **95% CI** | **p-value** |
| **Low functional capacity (SPPB)** |  |  |  |
| Crude model | 3.81 | 1.124 – 12.917 | **0.032** |
| Model 1 | 1.89 | 0.348 – 10.176 | 0.463 |
| Model 2 | 2.45 | 0.526 - 11.603 | 0.252 |
| **Frailty (CFS)** |  |  |  |
| Crude model | 4.69 | 1.314 – 16.709 | **0.017** |
| Model 1 | 1.56 | 0.256 – 9.552 | 0.629 |
| Model 2 | 2.39 | 0.490 – 11.678 | 0.281 |
| **Low functional capacity and frailty** | | |  |
| Crude model | 6.00 | 1.564 – 23.007 | **0.009** |
| Model 1 | 3.06 | 0.507 – 18.474 | 0.223 |
| Model 2 | 3.95 | 0.736 – 21.205 | 0.109 |
| **Score SPPB – CFS** | | | |
| Crude model | 0.82 | 0.691 - 0.974 | **0.027** |
| Model 1 | 0.94 | 0.738 – 1.196 | 0.612 |
| Model 2 | 0.89 | 0.724 - 1.094 | 0.269 |
| Model 1: adjusted for LVEF; EuroSCORE II; CPB Time; Aortic clamping time; Leukocytes; Urea. Model 2: adjusted for Backward (LVEF; CPB Time; Leukocytes). Logistic regression: p<0.05 was considered statistically significant. CI: Confidence Interval; OR: Odds Ratio. Post-surgical complications were considered: infectious (pneumonia and surgical site infection), renal (acute renal failure), neurological (hypoactive delirium), and cardiovascular (atrial fibrillation, low output syndrome, shock, type 2 acute myocardial infarction). | | | |
