# Supplementary material for: Combined assessment of low functional capacity and frailty in elective conventional cardiac surgery
Source: Research Square preprint supplement (doi:10.21203/rs.3.rs-8176099/v1), 2025-12-01
Supplement: Supplementary file 4 [file 97a82c02408ed213aa476545.docx]

| **Table 2.** Comparison of functional capacity and frailty before elective conventional cardiac surgery and hospital discharge | | | |
| --- | --- | --- | --- |
| **Variables** | **Before surgery (M0)** | **Hospital discharge (M1)** | **p-value** |
| ***Funcional capacity***  *SPPB* (point)  ***SPPB classification***  Incapacity  Low capacity  Moderate capacity  Good capacity | 8.4±2.0  0 (0)  14 (20.6)  31 (45.6)  23 (33.8) | 6.4±2.1  5 (7.7)  18 (27.7)  39 (60.0)  3 (4.3) | **<0.001a**  **<0.001c** |
| ***Frailty***  *CFS* (point)  ***CFS classification***  Not frail  Pre-frail  Frail | 2 [1.0-3.0]  55 (80.9)  9 (13.2)  4 (5.6) | 2 [2.0-4.0]  48 (73.8)  13 (20.0)  4 (6.2) | **<0.001b**  0.567c |
| aPaired t-test for variables with normal distribution, bSigned Rank Test for variables with non-normal distribution or cPearson's chi-square test; p<0.05 was considered statistically significant. SPPB: short physical performance battery; CFS: clinical frailty scale. | | | |
