# Supplementary material for: Combined assessment of low functional capacity and frailty in elective conventional cardiac surgery
Source: Research Square preprint supplement (doi:10.21203/rs.3.rs-8176099/v1), 2025-12-01
Supplement: Supplementary file 5 [file c06e218616aff06c3e8e4621.docx]

| **Table S1.** Characterization of the sample categorized according to low functional capacity, frailty and both conditions (n=68) | | | | | | | | | |
| --- | --- | --- | --- | --- | --- | --- | --- | --- | --- |
| **Variables** | **Low functional capacity** | | **p-value** | **Frailty** | | **p-value** | **Both** | | **p-value** |
| **Yes (n=14)** | **No (n=54)** | **Yes (n=13)** | **No (n=55)** | **Yes (n=12)** | **No (n=56)** |
| ***Sociodemographic***  Age  Male  Female  ***Race***  White  Black  Brown-skinned person  ***Education***  Incomplete high school  High school diploma  Bachelor's degree  ***Clinics***  ***Comorbidities***  Hypertension  Dyslipidemia  Diabetes  Chronic kidney disease  ***Medications***  Anti-hypertensive  Diuretic  Statin  Oral anticoagulant  Oral hypoglycemic  ***Diagnosis***  CAD  VHD  HF  CHD  LVEF (%) | 63.1±10.2  4 (9.3)  10 (40.0)  7 (17.9)  3 (30.0)  4 (21.1)  0 (0.0)  5 (15.2)  9 (26.5)  13 (25.5)  7 (16.3)  4 (21.1)  1 (1.5)  13 (19.1)  10 (41.7)  7 (15.9)  4 (36.4)  4 (21.1)  2 (15.4)  10 (21.3)  2 (50.0)  0 (0.0)  64.5 [58.5-69-5] | 59.7±12.1  39 (90.7)  15 (60.0)  32 (82.1)  7 (70.0)  15 (78.9)  1 (1.5)  28 (84.4)  25 (73.5)  38 (74.5)  36 (83.7)  15 (78.9)  0 (0.0)  38 (55.9)  14 (58.3)  37 (84.1)  7 (63.6)  15 (78.9)  11 (84.6)  37 (86.0)  2 (50.0)  4 (5.9)  65.5 [60.0-68.2] | **0.039**  **0.008**  0.492  0.600  **<0.001**  0.385  0.475  0.141  **0.008**  **<0.001**  0.260  0.123  0.115  0.433  0.909 | 64.1±12.3  4 (9.3)  9 (36.0)  5 (12.8)  3 (30.0)  5 (50.0)  0 (0.0)  6 (18.2)  7 (20.6)  12 (23.5)  7 (16.3)  4 (21.1)  1 (1.5)  12 (17.6)  10 (41.7)  7 (15.9)  4 (36.4)  4 (21.1)  2 (15.4)  8 (17.0)  3 (75.0)  0 (0.0)  63.0 [56.0-67.0] | 59.5±11.5  39 (90.7)  16 (64.0)  34 (87.2)  7 (70.0)  14 (73.7)  1 (1.5)  27 (81.8)  27 (79.4)  39 (76.5)  36 (83.7)  15 (78.9)  0 (0.0)  39 (57.4)  14 (58.3)  37 (84.1)  7 (63.6)  15 (78.9)  11 (84.6)  39 (83.0)  1 (25.0)  4 (5.9)  66.0 [61.0-69.0] | 0.209  **0.025**  0.184  0.987  0.153  0.511  0.102  **0.003**  0.212  **0.001**  0.230  0.129  0.570  0.117  0.241 | 62.2±10.9  3 (7.0)  9 (36.0)  5 (12.8)  3 (10.0)  4 (21.1)  0 (0.0)  5 (15.2)  7 (20.6)  12 (23.5)  7 (16.3)  4 (9.3)  1 (1.5)  11 (16.2)  10 (41.7)  7 (15.9)  4 (36.4)  4 (21.1)  2 (15.4)  8 (17.0)  2 (50.0)  0 (0.0)  63.5 [57.5-68.0] | 59.9±11.9  40 (93.0)  16 (64.0)  34 (87.2)  7 (70.0)  15 (78.9)  1 (100)  28 (84.8)  27 (79.4)  39 (76.5)  36 (83.7)  15 (78.9)  0 (0.0)  40 (78.4)  14 (58.3)  37 (84.1)  7 (63.6)  15 (78.9)  11 (84.6)  39 (83.0)  2 (50.0)  4 (100)  66.0 [60.2-68.8] | 0.547a  **0.006c**  **0.401c**  0.757c  0.269c  0.335c  0.727c  0.176c  0.191c  **0.003c**  0.321c  0.094c  0.727c  0.284c  0.420b |
| Continue | | | | | | | | | |

| **Table S1.** Characterization of the sample categorized according to low functional capacity, frailty and both conditions (n=68) | | | | | | | | | |
| --- | --- | --- | --- | --- | --- | --- | --- | --- | --- |
| **Variables** | **Low functional capacity** | | **p-value** | **Frailty** | | **p-value** | **Both** | | **p-value** |
| **Yes (n=14)** | **No (n=54)** | **Yes (n=13)** | **No (n=55)** | **Yes (n=12)** | **No (n=56)** |
| ***Nutritional***  BMI (kg/m2)  ***BMI classification***  Malnutrition  Eutrophic  Overweight  Obesity  ***Nutritional assessment***  *7p- SGA (point)*  Well-nutrition  Malnutrition | 26.7 [22.7-30.1]  3 (37.5)  3 (13.0)  4 (16.0)  4 (33.3)  7 [5.0-7.0]  10 (15.6)  4 (100.0) | 26.1 (23.8-28.9)  5 (62.5)  20 (87.0)  21 (84.0)  8 (66.7)  7 [7.0-7.0]  54 (84.4)  0 (0.0) | 0.791  0.182  **0.001**  **<0.001** | 26.9 [23.2-30.6]  2 (25.0)  4 (17.4)  3 (12.0)  4 (33.3)  7 [5.5-7.0]  10 (15.5)  3 (75.0) | 26.1 [23.8-28.9]  6 (75.0)  19 (82.6)  22 (88.0)  8 (66.7)  7 [7.0-7.0]  54 (84.4)  1 (25.0) | 0.634  0.147  **0.006**  **<0.001** | 27.8 [23.4-31.0]  2 (25.0)  3 (13.0)  3 (12.0)  4 (33.3)  7 [5.2-7.0]  9 (14.1)  3 (75.0) | 26.1 [23.8-28.8]  6 (75.0)  20 (87.0)  22 (88.0)  8 (66.7)  7 [7.0-7.0]  55 (85.9)  1 (75.0) | 0.316b  0.360c  **0.005b**  **0.016b** |
| ***Muscle strength***  HGS (kg/f)  Reduced | 23.9±7.8  3 (4.8) | 34.8±8.6  2 (40.0) | **<0.001**  0.076 | 23.5±8.0  4 (80.0) | 34.7±8.5  1 (20.0) | **<0.001**  **0.001** | 23.8±8.2  3 (4.8) | 34.4±8.7  2 (40.0) | **<0.001a**  **0.035c** |
| ***Surgical***  *EuroSCORE II* (%)  ***Surgical approach***  CABG  SMVR  SAVR  Combined (CABG + VR)  Others  CPB time (minutes)  Aortic clamping time (minutes)  MV time (days)  ICU time (days)  Length of stay (days) | 2.1 [1.0-3.1]  1 (9.1)  7 (25.9)  5 (22.7)  0 (0.0)  1 (20.0)  120 [107.5-151.5]  91.5 [76.5-117.5]  2.0±2.7  5 [3.0-7.2]  8 [5.8-14.2] | 0.9 [0.7-1.5]  10 (90.9)  20 (74.1)  17 (77.3)  3 (100.0)  4 (80.0)  110 [95.8-127.8]  82 [72.5-93.0]  1.0±0.1  3 [3.0-4.2]  5 [4.8-7.0] | **0.010**  0.612  0.207  0.328  **0.005**  **0.017**  **0.004** | 2.8±1.8  1 (9.1)  7 (25.9)  4 (18.2)  0 (0.0)  1 (20.0)  114 [103.5-158.0]  81 [73.5-120.0]  2.1±2.8  5 [3.0-7.5]  9 [6.5-14.5] | 1.0 [0.7-1.5]  10 (90.9)  20 (74.1)  18 (81.8)  3 (100.0)  4 (80.0)  110 [96.0-130.0]  83 [73.0-93.0]  1.0±0.1  3 [3.0-4.0]  5 [5.0-7.0] | **0.002**  0.888  0.502  0.668  **0.003**  **0.018**  **0.002** | 2.6±1.7  1 (9.1)  6 (22.2)  4 (18.2)  0 (0.0)  1 (20.0)  117 [104.5-164.5]  85.5 [73.5-122.5]  2.2±2.9  5.5 [3.2-7.8]  9.5 [7.0-14.8] | 1. [0.7-1.5]   10 (90.9)  21 (77.8)  18 (81.8)  3 (100)  4 (80.0)  110 [96.8-129.2]  82.5 [73.0-93.0]  1 [1.0-1.0]  3 [3.0-4.0]  5 [4.2-7.0] | **0.008b**  0.807c  0.384b  0.499b  **0.002b**  **0.007b**  **<0.001b** |
| aStudent's t-test for variables with normal distribution, bMann-Whitney test for variables with non-normal distribution or cPearson's chi-square test; p<0.05 was considered statistically significant. CAD: coronary artery disease; VHD: valvular heart disease; HF: heart failure; CHD: congenital heart disease; LVEF: left ventricular ejection fraction; BMI: body mass index; 7p-SGA: 7-point subjective global assessment; HGS: handgrip strength; EuroSCORE II: European System for Cardiac Operative Risk Evaluation II; CABG: coronary artery bypass graft surgery; SMVR: surgical mitral valve replacement; SAVR: surgical aortic valve replacement; VR: valve replacement; CPB: cardiopulmonary bypass; MV: mechanical ventilation; ICU: intensive care unit. | | | | | | | | | |
